# Supplementary material for: Accounting for the effect of forest and fragmentation in probabilistic rockfall hazard
Source: Copernicus journal article supplement (doi:10.5194/egusphere-2022-1521), 2023-02-07
Supplement: Supplementary file 1 [file egusphere-2022-1521-supplement.pdf]

Supplementary material

Table S1. Parameters of the tree-impact algorithm corresponding to a quercus robur tree forest: (i) height of stem [m], (ii) average height of trees [m], (iii) size of crown of tree [m], (iv) average DBH [m], (v) minimum distance between impacts [m], (vi) and maximum amount of kinetic energy that could be dissipated by a tree [J]

| Parameter                                                                | value |
|--------------------------------------------------------------------------|-------|
| height of stem                                                           | 4.85  |
| average height of trees [m]                                              | 14.97 |
| size of crown of tree [m]                                                | 2.9   |
| average diameter at breast height [m]                                    | 0.42  |
| minimum distance between impacts [m]                                     | 10    |
| maximum amount of kinetic energy that could be dissipated by a tree [kJ] | 63.3  |

5

Table S2. Parameters of the fragmentation algorithm: (i) density of the generated fragments [kg/m<sup>3</sup>], (ii) Young's elastic modulus of the rock [Pa], (iii) Poisson's coefficient of the rock [-], (iv) stress at break [Pa].

| Parameter                                 | value   |
|-------------------------------------------|---------|
| Density of fragments [kg/m <sup>3</sup> ] | 2700    |
| Young's modulus [Pa]                      | 4.0E+10 |
| Poisson's ratio [-]                       | 0.23    |
| Limit stress [Pa]                         | 2.2E+08 |

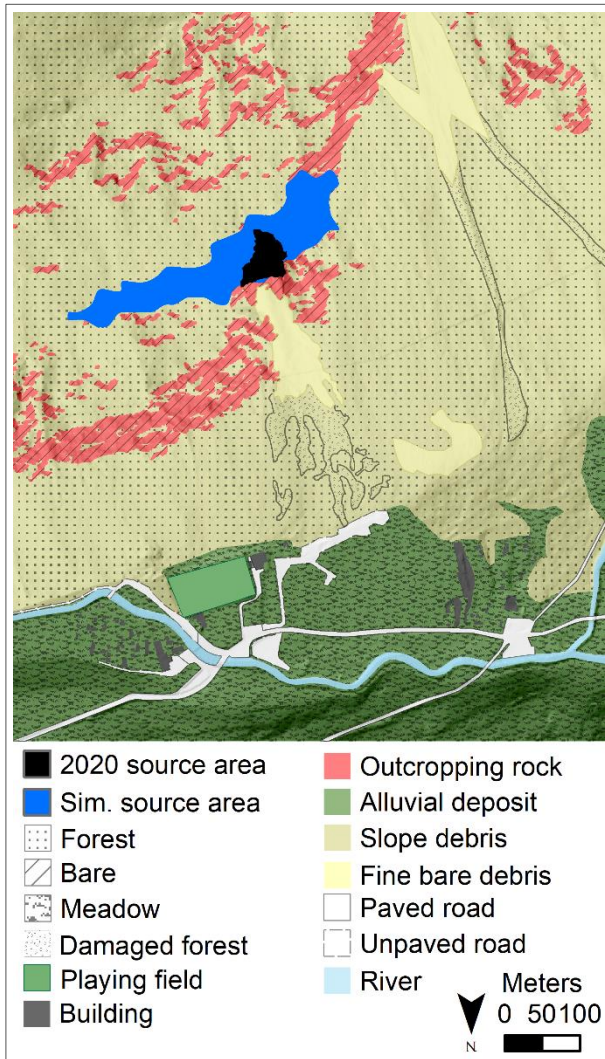

Figure S1 Unique conditions map for the Saint-Oyen case study. The associated values of normal ( $e_n$ ) and tangential restitution ( $e_t$ ) coefficients and of the friction coefficient ( $\mu_s$ ) are reported in Table 1.

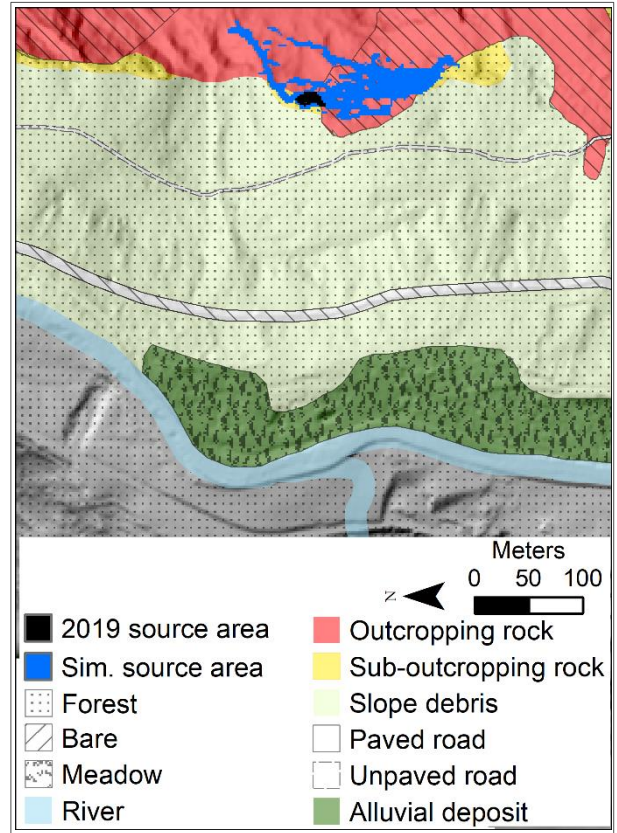

Figure S2 Unique conditions map for the Saint-Oyen case study. The associated values of normal ( $e_n$ ) and tangential restitution ( $e_t$ ) coefficients and of the friction coefficient ( $\mu_s$ ) are reported in Table 2.

*Table S1 List of the numerical simulations together with source area information and the corresponding volumes.*

| <i>ID</i>                    | <i>Block volume</i>     | <i>Launched<br/>blocks per cell</i> | <i>Number of<br/>source<br/>cells</i> | <i>Source<br/>Location</i> | <i>Specific<br/>algorithm<br/>activated</i> |
|------------------------------|-------------------------|-------------------------------------|---------------------------------------|----------------------------|---------------------------------------------|
| SO_HS_Event                  | 2020 event distribution | 13                                  | 2,801                                 | 2020 event                 | N                                           |
| SO_HS <sub>tree</sub> _Event | 2020 event distribution | 13                                  | 2,801                                 | 2020 event                 | Y                                           |
| SO_HS_S1                     | scenario S1             | 5                                   | 199                                   | potential future source    | N                                           |
| SO_HS_S2                     | scenario S2             | 5                                   | 199                                   | potential future source    | N                                           |
| SO_HS_S3                     | scenario S3             | 5                                   | 199                                   | potential future source    | N                                           |
| SO_HS_S4                     | scenario S4             | 5                                   | 199                                   | potential future source    | N                                           |
| SO_HS_S5                     | scenario S5             | 5                                   | 199                                   | potential future source    | N                                           |
| SO_HS <sub>tree</sub> _S1    | scenario S1             | 5                                   | 199                                   | potential future source    | Y                                           |
| SO_HS <sub>tree</sub> _S2    | scenario S2             | 5                                   | 199                                   | potential future source    | Y                                           |
| SO_HS <sub>tree</sub> _S3    | scenario S3             | 5                                   | 199                                   | potential future source    | Y                                           |
| SO_HS <sub>tree</sub> _S4    | scenario S4             | 5                                   | 199                                   | potential future source    | Y                                           |
| SO_HS <sub>tree</sub> _S5    | scenario S5             | 5                                   | 199                                   | potential future source    | Y                                           |
| R_HS_Event                   | 2019 event distribution | 100                                 | 46                                    | 2019 event                 | N                                           |
| R_HS <sub>frag</sub> _Event  | 2019 event distribution | 100                                 | 46                                    | 2019 event                 | Y                                           |
| R_HS <sub>short</sub> _Event | 2019 event distribution | 100                                 | 46                                    | 2019 event                 | N                                           |
| R_FI_S1                      | scenario S1             | 2                                   | 1,323                                 | potential future source    | N                                           |
| RO_HS_S2                     | scenario S2             | 2                                   | 1,323                                 | potential future source    | N                                           |
| RO_HS_S3                     | scenario S3             | 2                                   | 1,323                                 | potential future source    | N                                           |
| RO_HS_S4                     | scenario S4             | 2                                   | 1,323                                 | potential future source    | N                                           |
| RO_HS_S5                     | scenario S5             | 2                                   | 1,323                                 | potential future source    | N                                           |
| RO_HS <sub>frag</sub> _S1    | scenario S1             | 2                                   | 1,323                                 | potential future source    | Y                                           |
| RO_HS <sub>frag</sub> _S2    | scenario S2             | 2                                   | 1,323                                 | potential future source    | Y                                           |
| RO_HS <sub>frag</sub> _S3    | scenario S3             | 2                                   | 1,323                                 | potential future source    | Y                                           |
| RO_HS <sub>frag</sub> _S4    | scenario S4             | 2                                   | 1,323                                 | potential future source    | Y                                           |
| RO_HS <sub>frag</sub> _S5    | scenario S5             | 2                                   | 1,323                                 | potential future source    | Y                                           |

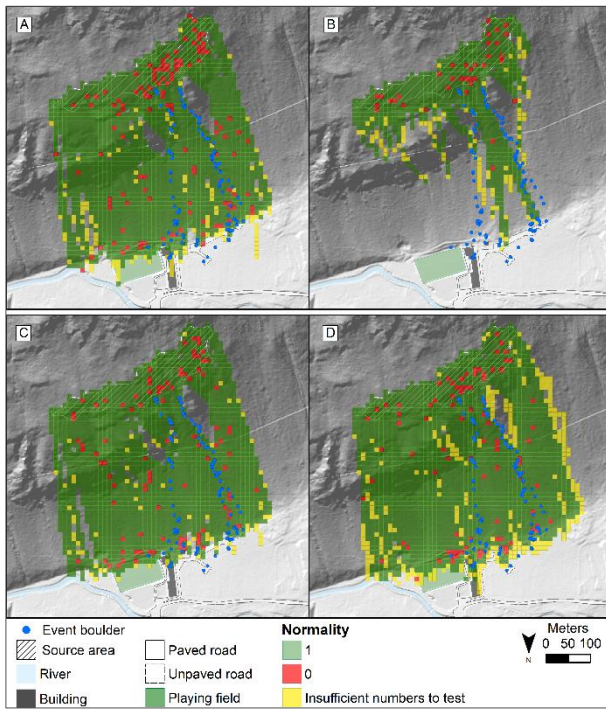

*Figure S3 Normality results obtained from the Kolmogorov-Smirnov test in Saint-Oyen case study. Panel a) and b) refer to S1 scenario without and with adopting the tree-impact algorithm, respectively; panel c) and d) refer to S5 scenario without and with adopting the tree-impact algorithm, respectively*

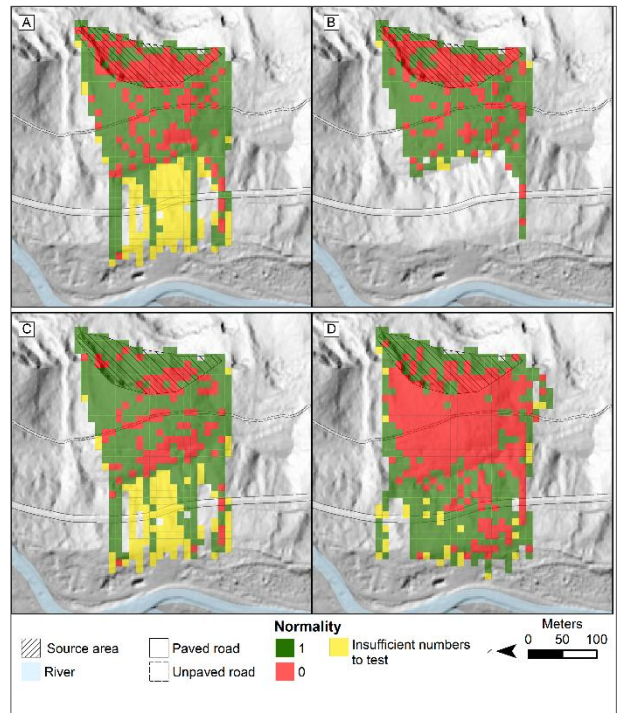

*Figure S4 Normality results obtained from the Kolmogorov-Smirnov test in Roisan case study. Panel a) and b) refer to S1 scenario without and with adopting the fragmentation algorithm, respectively; panel c) and d) refer to S5 scenario without and with adopting the fragmentation algorithm, respectively.*



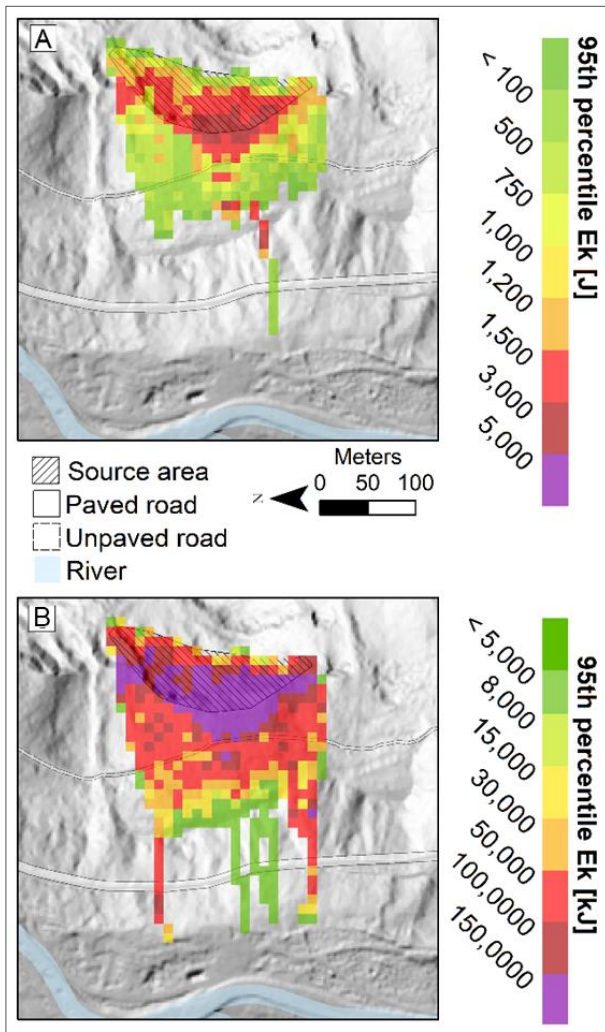

Figure S5 95<sup>th</sup> percentile values for the S1 (A) and S5 (B) scenarios with different  $HS_{short}$  model back-calibration approach. They differ from those obtained with the other calibration approach only in the models with implicit fragmentation: in A) only one trajectory passes the paved road and with lower energy than in the same case shown in **Errore. L'origine riferimento non è stata trovata.**; also in B) far fewer trajectories pass the paved road unlike the same case in **Errore. L'origine riferimento non è stata trovata.** In contrast, the scenarios modeled with the explicit fragmentation approach (Figure 4 B and D) do not differ significantly from their counterparts in because in both cases, when the fragmentation algorithm is

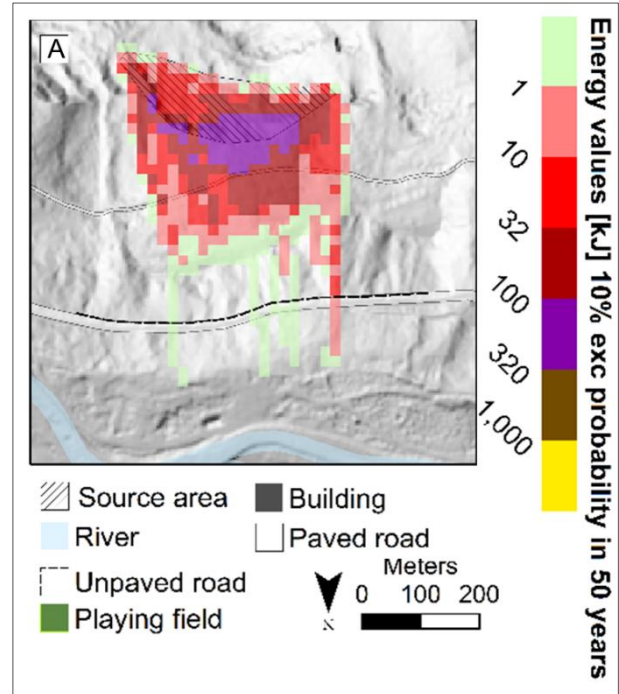

Figure S6 Hazard map for  $HS_{short}$  model. With respect to the  $HS$  model, the area involved is less sparse, crossing the paved road only in five spots. Only the rightmost corridor is characterized by an energy value associated to 10% exceedance probability in 50 years higher than 1 kJ.

activated, it is this that controls the block dynamics and thus the kinetic energies the most.

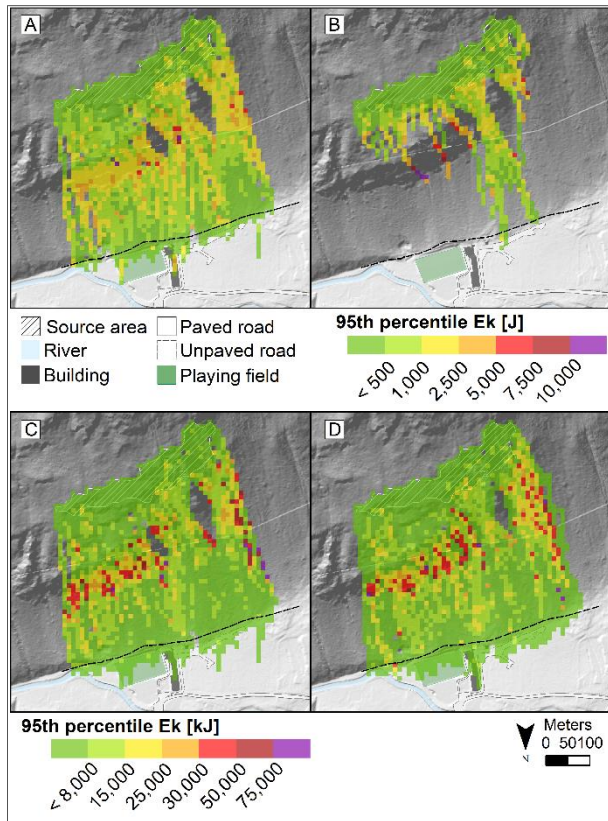

Figure S7 Distribution of kinetic energy of blocks along the slope in Saint-Oyen case study. The value of each cell corresponds to the 50<sup>th</sup> percentile of the kinetic energy of the blocks passing through that cell. Box A) scenario S1 (small blocks) HS, B) scenario S1 (small blocks) HS<sub>frag</sub>, C) scenario S5 (large blocks) HS, D) scenario S5 (large blocks) HS<sub>frag</sub>.

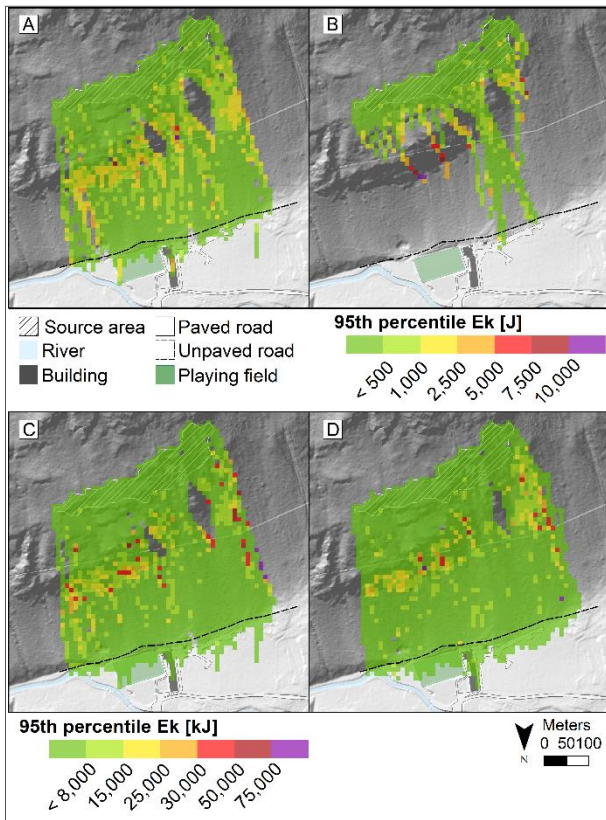

25 *Figure S8 Distribution of kinetic energy of blocks along the slope in Saint-Oyen case study. The value of each cell corresponds to the 25<sup>th</sup> percentile of the kinetic energy of the blocks passing through that cell. Box A) scenario S1 (small blocks) HS, B) scenario S1 (small blocks) HS<sub>frag</sub>.*

30 C) scenario S5 (large blocks) HS, D) scenario S5 (large  
blocks) HS<sub>frag</sub>.

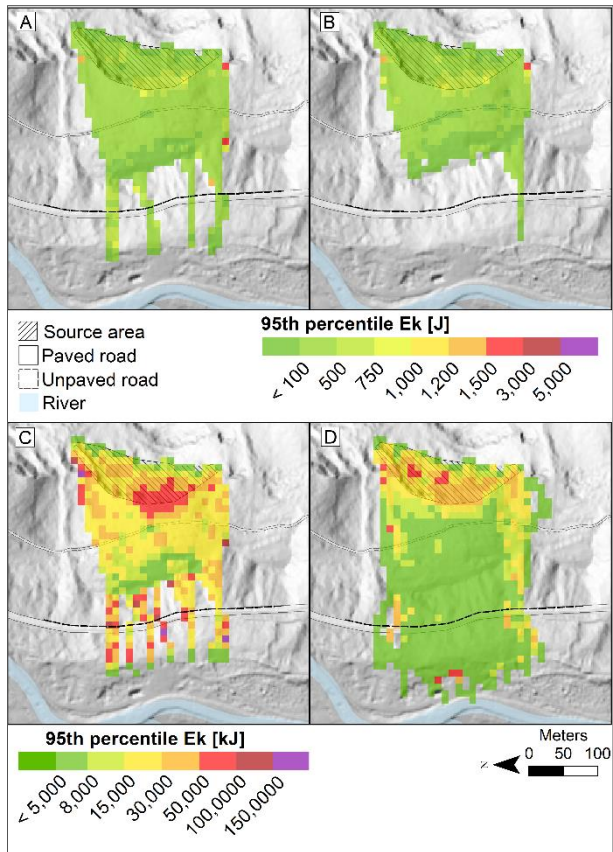

35 Figure S9 Distribution of kinetic energy of blocks along  
the slope in Roisan case study. The value of each cell  
corresponds to the 50<sup>th</sup> percentile of the kinetic energy of  
the blocks passing through that cell. Box A) scenario S1  
(small blocks) HS, B) scenario S1 (small blocks) HS<sub>frag</sub>,  
C) scenario S5 (large blocks) HS, D) scenario S5 (large  
40 blocks) HS<sub>frag</sub>.



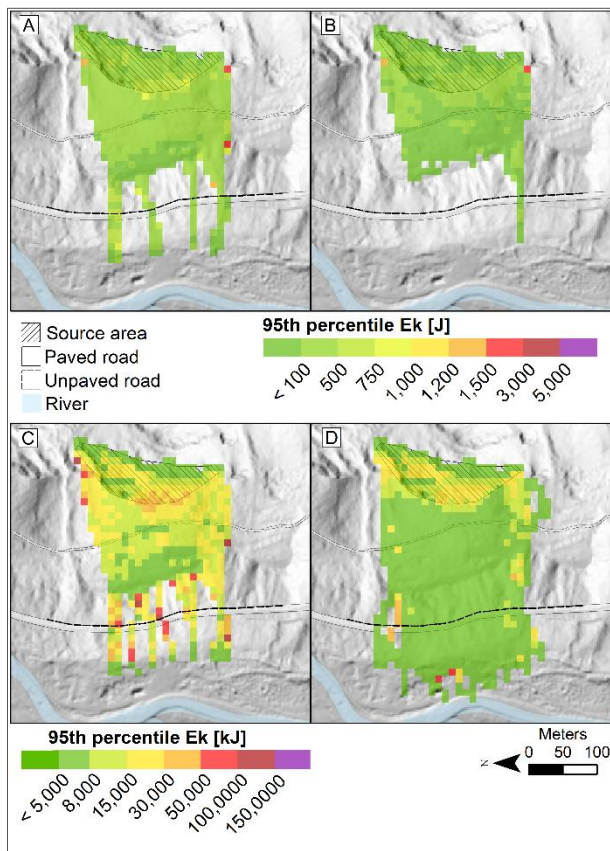

Figure S10 Distribution of kinetic energy of blocks along the slope in Roisan case study. The value of each cell corresponds to the 25<sup>th</sup> percentile of the kinetic energy of the blocks passing through that cell. Box A) scenario S1 (small blocks) HS, B) scenario S1 (small blocks) HS<sub>frag</sub>, C) scenario S5 (large blocks) HS, D) scenario S5 (large blocks) HS<sub>frag</sub>.
